# Supplementary material for: A Multifactor Analysis of Fungal and Bacterial Community Structure in the Root Microbiome of Mature Populus deltoides Trees
Source: PLOS journal article supplement (doi:10.1371/journal.pone.0076382), 2013-10-16

**Unweighted Unifrac Bacteria**

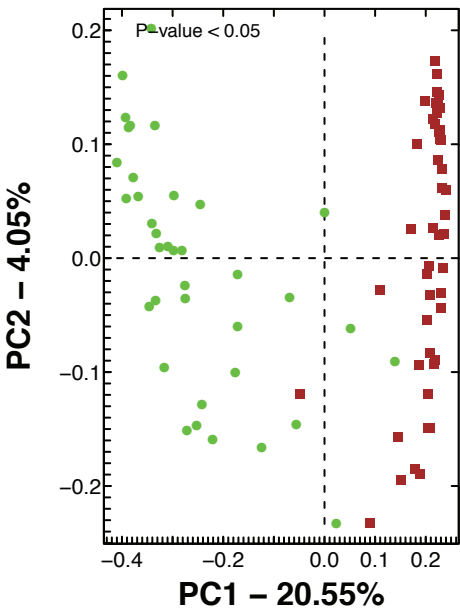

**Unweighted Unifrac Fungi**

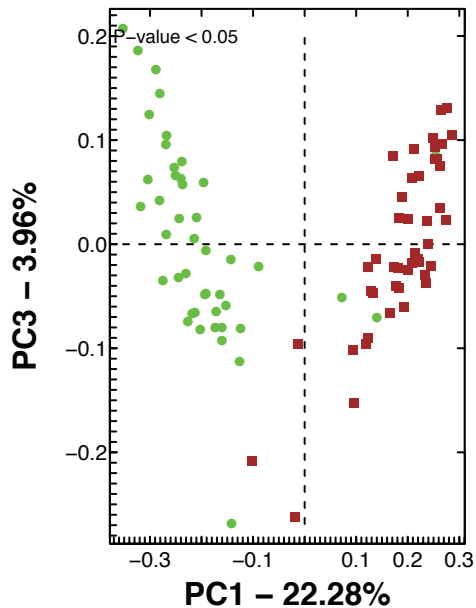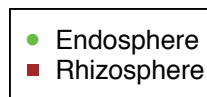

Supplement: S5 (10.1371/journal.pone.0076382.s005) [file journal.pone.0076382.s005]
