# Supplementary material for: A Multifactor Analysis of Fungal and Bacterial Community Structure in the Root Microbiome of Mature Populus deltoides Trees
Source: PLoS One. 2013 Oct 16;8(10):e76382. doi: 10.1371/journal.pone.0076382 (PMC3797799; doi:10.1371/journal.pone.0076382)
Supplement: Table S1 — Table of Tree locations, host and site/stand properties. (XLSX) [file pone.0076382.s010.xlsx]

## Sheet: Sheet1
TreeID	Latitude	Longitude	DBH (cm)	Distance to river (m)	Distance to closest Populus (m)	Distance from tree to sampled roots (m)	Number of proximal trees (Prism)	Number of proximal poplar trees (Prism)	Canopy width (m)	Basal area (m2)	Basal area per hectare (All tree)	Basal area per hectare (Populus)	% basal area dominance populus / hectare
TNP03	36° 14' 31.8" N	85° 56' 39.1" W	73.5	14.02	3.5	2	4	2	16.61	0.4	2.1	1.3	60
TNP04	36° 08' 32.1" N	85° 48' 23.6" W	122.4	32.9	3.05	2.5	10	4	23.85	1.2	12.9	5.9	45.4545
TNP05	36° 06' 02.9" N	85° 49' 55.3" W	77	15.24	4	3.3	7	5	12.25	0.5	3.7	2.8	75
TNP06	36° 07' 00.7" N	85° 50' 40.0" W	80	13.6	6.3	1.4	10	1	16.3	0.5	5.5	1	18.1818
TNP07	36° 08' 44.5" N	85° 51' 51.7" W	68.5	18.4	1.92	0.51	9	2	12.51	0.4	3.7	1.1	30
TNP08	36° 08' 53.3" N	85° 50' 28.5" W	71	13	no Pop	0.67	8	0	10.6	0.4	3.6	0.4	11.1111
TNP09	36° 11' 07.9" N	85° 54' 17.5" W	68	26.4	5.8	0.46	3	1	15.85	0.4	1.5	0.7	50
TNP10	36° 07' 54.9" N	85° 48' 23.01" W	56	11	no Pop	2.14	5	0	52	0.2	1.5	0.2	16.6667
TNP11	36° 12' 6.4" N	85° 56' 6.5" W	61	40	1.6	0.8	3	3	9.8	0.3	1.2	1.2	100
TNP2B	36° 14' 57.7" N	85° 57' 25.1" W	119	25.2	4.7	4	3	1	18.14	1.1	4.4	2.2	50
TNP5B	36° 06' 11.3" N	85° 50' 4.9" W	87.5	30.8	11	2.2	8	1	15.9	0.6	5.4	1.2	22.2222
TNP9A	36° 10' 18.2" N	85° 54' 05.6" W	84.3	30.48	14	0.2	6	0	21.8	0.6	3.9	0.6	14.2857
NCP01	35° 44' 45.6" N	80° 19' 87.5" W	66.3	0 (on stream /creek)	20	2.5	4	0	9.41	0.3	1.7	0.3	20
NCP02	35° 43' 73.8" N	80° 20' 77.0" W	51.7	0	10	1	1	1	12.05	0.2	0.4	0.4	100
NCP03	35° 56' 47.4" N	80° 41' 38.8" W	66.4	6.4	1.52	0.5	9	4	15.6	0.3	3.5	1.7	50
NCP04	35° 43' 35.5" N	80° 23' 71.1" W	47.25	106.7	6.01	1.98	12	4	12.75	0.2	2.3	0.9	38.4615
NCP05	35° 50' 17.1" N	80° 29' 08.3" W	62.8	55.5	no Pop	6.4	9	0	13.1	0.3	3.1	0.3	10
NCP06	35° 48' 11.1" N	80° 33' 25.0" W	71.5	16.9	no Pop	7	7	0	11.83	0.4	3.2	0.4	12.5
NCP07	35° 45'42.1" N	80° 30' 38.6" W	37.7	53.5	0.23	1.59	8	3	8.23	0.1	1	0.4	44.4444
NCP08	35° 53'13.0" N	80° 48' 94.7" W	119.5	70.1	5.48	6.19	11	1	25.9	1.1	13.5	2.2	16.6667
NCP09	35° 47'51.8" N	80° 28' 16.0" W	95	2	50	15.24	10	7	21.89	0.7	7.8	5.7	72.7273
NCP10	35° 51'59.0" N	80° 23' 29.3" W	82.5	20	no Pop	6.1	9	0	16.15	0.5	5.3	0.5	10
NCP11	35° 44'50.1" N	80° 27' 39.0" W	69.6	2.13	no Pop	0.36	14	0	14.88	0.4	5.7	0.4	6.66667
