# Supplementary material for: A Multifactor Analysis of Fungal and Bacterial Community Structure in the Root Microbiome of Mature Populus deltoides Trees
Source: PLoS One. 2013 Oct 16;8(10):e76382. doi: 10.1371/journal.pone.0076382 (PMC3797799; doi:10.1371/journal.pone.0076382)
Supplement: Table S6 — Detailed list and closely related organisms for each core bacterial OTU. (XLSX) [file pone.0076382.s015.xlsx]

## Sheet: Sheet1
OTU #	Sequence name	Phylum	Order	Closest sequenced relative	Percent identity	Ave. Relative Abundance (rhizosphere)	Endosphere	All rhizosphere samples	All endosphere samples	Putative function
1211	R.M.N.01_5637	Acidobacteria	Desulfuromonadales	Geobacter sulfurreducens PCA	0.89	0.00693478		+		Fe(III)-reducing bacteria
3934	E.M.N.09_9900	Acidobacteria	Desulfuromonadales	Geobacter pelophilus strain Dfr2	0.88	0.00534783		+
5037	R.M.N.06_6390	Acidobacteria	Desulfuromonadales	Geobacter daltonii FRC-32 strain FRC-32	0.92	0.00326087				An Fe(III)- and uranium(VI)-reducing bacterium, designated strain FRC-32(T), was isolated from a contaminated subsurface of the USA Department of Energy Oak Ridge Field Research Center (ORFRC) in Oak Ridge, Tennessee
16727	E.M.N.07_6778	Acidobacteria	Solirubrobacterales	Solirubrobacter soli strain Gsoil 355	1	0.00371739
18613	E.M.N.05_2028	Acidobacteria	Solibacterales	Candidatus Solibacter usitatus Ellin6076	0.99	0.00443478
20548	E.M.N.07_574	Acidobacteria	Desulfuromonadales	Geobacter psychrophilus strain P35	0.9	0.00682609				Can couple the reduction of Fe(III) to the oxidation of acetate, butanol, ethanol, formate, lactate, malate, pyru- vate and succinate as the electron donor
27680	E.S.N.09_9026	Acidobacteria	Acidobacteriales	Thermolithobacter ferrireducens strain KA2	0.89	0.00597826		+		chemolithotrophic, thermophilic, anaerobic bacteria , isolated from rice paddy soil
3066	E.M.N.09_10745	Actinobacteria	Actinomycetales	Mycobacterium setense	1	0.00467391		+		organism isolated from a patient with soft tissue infection and osteitis.
4037	R.M.N.01_4196	Actinobacteria	Nitriliruptoridae	Nitriliruptor alkaliphilus DSM 45188 strain ANL-iso2	0.93	0.00478261		+		a deep-lineage haloalkaliphilic actinobacterium from soda lakes capable of growth on aliphatic nitriles
2637	E.M.N.05_2811	Actinobacteria	Actinomycetales	Microlunatus phosphovorus NM-1 $$	0.99	0.0028
24338	E.M.N.07_7441	Chloroflexi	Anaerolineales	Longilinea arvoryzae ribosomal RNA	0.86	0.00373913		+		strictly anaerobic, filamentous bacteria
1413	E.M.T.10_7348	Proteobacteria	Rhizobiales	Zavarzinella formosa strain : A10	0.87	0.00267391				was a moderately acidophilic, mesophilic organism capable of growth at pH values between 3.8 and 7.2 (with an optimum at pH 5.5–6.0) and at temperatures between 10 and 30 °C
5154	E.M.N.03_4507	Proteobacteria	Rhodospirillales	Nisaea nitritireducens strain DR41_18	0.93	0.00273913				from the Mediterranean Sea.
8886	E.M.N.01_5373	Proteobacteria	Xanthomonadales	Nevskia soli strain GR15-1	1	0.0151087		+	+	isolated from a field cultivated with Korean ginseng. Cells were strictly aerobic, motile
9201	E.M.N.07_5913	Proteobacteria	Xanthomonadales	Steroidobacter denitrificans strain FS	0.94	0.00469565		+		a steroidal hormone-degrading gammaproteobacterium.
10210	E.M.N.09_10684	Proteobacteria	Rhizobiales	Hyphomicrobium sulfonivorans strain S1	0.95	0.0118261		++
12581	E.M.N.03_8396	Proteobacteria	Methylophilales	Methylovorus glucosetrophus SIP3-4	1	0.00452174				cycling of C1 compounds in Lake Washington and potentially globally
12723	E.M.N.11_14924	Proteobacteria	Gallionellales	Gallionella capsiferriformans ES-2 strain ES-2	0.94	0.00573913
12806	E.M.N.07_6025	Proteobacteria	Rhodobacterales	Ponticaulis koreensis DSM 19734	0.94	0.00367391				was isolated from seawater that had been collected on the coast of Jeju, Korea.
13148	E.M.N.08_2142	Proteobacteria	Rhizobiales	Rhodoplanes elegans strain AS130	0.96	0.014913		++		They were also characterized by their capacity for complete denitrification and their production of both ubiquinone-10 and rhodoquinone-10 as major quinones
14206	E.M.N.07_5254	Proteobacteria	Burkholderiales	Oxalicibacterium flavum strain TA17	0.96	0.00943478		+		A mesophilic, aerobic oxalic acid utilizing yellow-pigmented bacterium (Pseudomonads)
15435	E.M.N.03_5405	Proteobacteria	Rhizobiales	Bradyrhizobium japonicum	1	0.0317174		++	+	fix nitrogen in exchange for carbohydrates from the plant
17447	E.M.N.01_4275	Proteobacteria	Myxococcales	Kofleria flava strain Pl vt1 ribosomal RNA, complete sequence	0.92	0.00358696		+	+
19176	E.S.N.09_6212	Proteobacteria	Syntrophobacterales	Desulfoglaeba alkanexedens ALDC strain ALDC	0.94	0.00154348				an n-alkane-degrading, sulfate-reducing bacterium
20376	E.M.N.04_100	Proteobacteria	Rhizobiales	Agrobacterium radiobacter K84 strain K84	1	0.00456522				opportunistic pathogen
22702	E.M.N.03_8799	Proteobacteria	Caulobacterales	Caulobacter sp. strain FWC21	0.99	0.00284783				oligotrophic, As caulobacteria are present in almost every water sample and are believed to play an important role in the carbon cycling within their habitats,
23419	E.S.N.06_3457	Proteobacteria	Rhizobiales	Agrobacterium fabrum str. C58 strain C58	1	0.0132174		++		plant pathogen
23459	E.M.N.09_2755	Proteobacteria	Burkholderiales	Variovorax paradoxus EPS strain EPS	1	0.0126739		+		ariovorax paradoxus is a ubiquitous, aerobic, gram negative bacterium present in diverse environments [1,2]. This organism, originally classified in either the genus Alcaligenes or Hydrogenomonas, has been associated with a number of interesting biotransformations, including atrazine degradation [3], nitrotyrosine assimilation [4], and mineralization of acyl-homoserine lactone signals [5]. Recent…
24004	E.M.N.07_1746	Proteobacteria	Burkholderiales	Burkholderia phymatum STM815 strain STM815	0.96	0.0178043		+
24018	E.M.N.02_6436	Proteobacteria	Burkholderiales	Thiobacter subterraneus strain C55	0.96	0.0108913		++		bligately chemolithoautotrophic, thermophilic, sulfur-oxidizing bacterium from a subsurface hot aquifer.
24967	E.M.N.03_262	Proteobacteria	Rhizobiales	Zoogloea oryzae strain A-7	0.97	0.00273913				a nitrogen-fixing bacterium
25294	E.M.N.04_3785	Proteobacteria	Burkholderiales	Methylibium fulvum strain Gsoil 322	1	0.0288696	*	++	+	Reduces nitrate to nitrite.
25950	E.M.N.09_2926	Proteobacteria	Burkholderiales	Duganella violaceinigra strain YIM 31327	1	0.0101087		+		mesophilic bacterium
11162	E.M.N.09_6570	Verrucomicrobia	Verrucomicrobiales	Prosthecobacter fluviatilis strain HAQ-1	0.88	0.0028913				able to degrade the NaOH-treated sheath of L. cholodnii
15696	E.M.N.07_7248	Verrucomicrobia	Verrucomicrobiales	Haloferula phyci strain AK18-024	0.89	0.00732609				The novel isolates produced carotenoid pigments and squalene
**	also core of the endosphere
+	present in more than 90% of all samples
++	found in 100% of all samples
$$	rhizosphere specific
